# Supplementary material for: Fruit Phenology of Two Hazelnut Cultivars and Incidence of Damage by Halyomorpha halys in Treated and Untreated Hazel Groves
Source: MDPI journal article supplement (doi:10.3390/horticulturae9060727), 2023-06-20
Supplement: s1 [file s1]

**Table S1.** Dates of hazelnut fall beginning, first commercial harvest (40% of the hazelnuts fallen), and the second commercial harvest (95-100% of the hazelnut fallen) for cultivar San Giovanni and Tonda Romana.

| Day of the year | San Giovanni              | Tonda Romana              |
|-----------------|---------------------------|---------------------------|
| 215             | Beginning fall            |                           |
| 218             |                           | Beginning fall            |
| 236             | First commercial harvest  |                           |
| 243             |                           | First commercial harvest  |
| 246             | Second commercial harvest |                           |
| 253             |                           | Second commercial harvest |
