# Supplementary figures and images for: Fruit Phenology of Two Hazelnut Cultivars and Incidence of Damage by Halyomorpha halys in Treated and Untreated Hazel Groves
Source: MDPI journal article supplement (doi:10.3390/horticulturae9060727), 2023-06-20

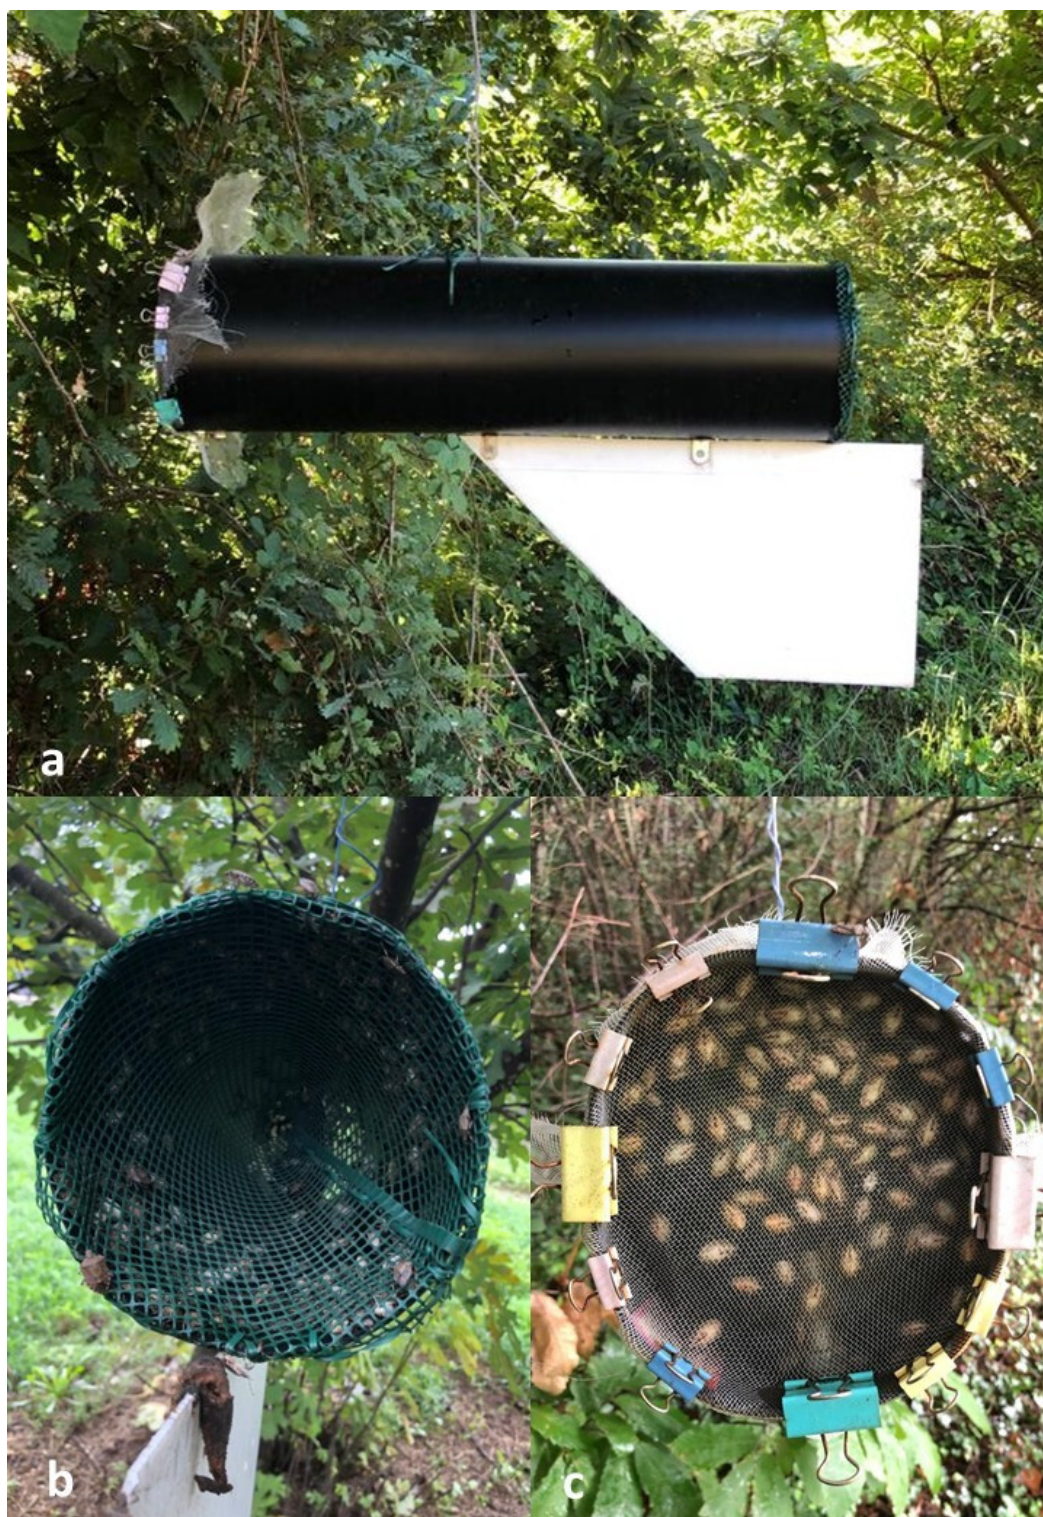

**Figure S1.** Trap used for *Halyomorpha halys* monitoring. a: Lateral view; b: Frontal view; c: Back view.

Supplement: s1 [file s1]
